# Supplementary material for: Enhanced Skin Permeation of 5-Fluorouracil through Drug-in-Adhesive Topical Patches
Source: MDPI journal article supplement (doi:10.3390/pharmaceutics16030379), 2024-03-10
Supplement: s1 [file s1]

## Supplementary Information

**Table S1.** Optimisation of casting thickness for achieving the target drug loading.

| Formulation | Wet casting thickness<br>( $\mu\text{m}$ ) | *Dry thickness<br>( $\mu\text{m}$ ) | $\wedge$ Dry weight<br>( $\text{mg}/\text{cm}^2$ ) | Drug content<br>( $\mu\text{g}/\text{cm}^2$ ) |
|-------------|--------------------------------------------|-------------------------------------|----------------------------------------------------|-----------------------------------------------|
| Control     | 500                                        | $266.7 \pm 15.1$                    | $12.4 \pm 0.4$                                     | $424.8 \pm 24.2$                              |
|             | 750                                        | $358.3 \pm 7.5$                     | $19.3 \pm 1.0$                                     | $766.2 \pm 31.3$                              |
|             | 1000                                       | $496.7 \pm 17.5$                    | $29.0 \pm 0.7$                                     | $1192.7 \pm 34.9$                             |

\*Overall thickness of the patches including the drug-in-adhesive layer, the release liner ( $75 \mu\text{m}$ ) and the backing membrane ( $76.2 \mu\text{m}$ ).  $\wedge$ dry weight of the patches including the drug-in-adhesive layer and backing membrane. The results are presented as the mean  $\pm$  standard deviation ( $n = 6$ ).

**Table S2.** Questionnaire for the evaluation of drug-free drug-in-adhesive patches involving healthy volunteers.

**Participant ID:** \_\_\_\_\_

**Date:** \_\_\_\_\_

**1. The patches offered an easy removal from the release liner.**

|            | Extremely disagree | Somewhat disagree | Neither agree nor disagree | Somewhat agree | Extremely agree |
|------------|--------------------|-------------------|----------------------------|----------------|-----------------|
| Patch-TRAN |                    |                   |                            |                |                 |
| Patch-OA   |                    |                   |                            |                |                 |

**2. The patches offered enough initial adhesion so that the patches did not fall off immediately after application.**

|            | Extremely disagree | Somewhat disagree | Neither agree nor disagree | Somewhat agree | Extremely agree |
|------------|--------------------|-------------------|----------------------------|----------------|-----------------|
| Patch-TRAN |                    |                   |                            |                |                 |
| Patch-OA   |                    |                   |                            |                |                 |

**3. The patches offer enough ongoing adhesion for 72 hours. If any of the patches fell off before 72 hours, please indicate the time.**

|            | Extremely disagree | Somewhat disagree | Neither agree nor disagree | Somewhat agree | Extremely agree | Time taken if fell off within 72 hours |
|------------|--------------------|-------------------|----------------------------|----------------|-----------------|----------------------------------------|
| Patch-TRAN |                    |                   |                            |                |                 |                                        |
| Patch-OA   |                    |                   |                            |                |                 |                                        |

**4. The patches offered good wear comfort over 72 hours.**

|            | Extremely disagree | Somewhat disagree | Neither agree nor disagree | Somewhat agree | Extremely agree |
|------------|--------------------|-------------------|----------------------------|----------------|-----------------|
| Patch-TRAN |                    |                   |                            |                |                 |

---

Patch-OA

---

5. The patches offered an easy removal from the skin after 72 hours.

|                    |                   |                            |                |                 |
|--------------------|-------------------|----------------------------|----------------|-----------------|
| Extremely disagree | Somewhat disagree | Neither agree nor disagree | Somewhat agree | Extremely agree |
|--------------------|-------------------|----------------------------|----------------|-----------------|

Patch-TRAN

Patch-OA

6. Indicate any signs or symptoms of local irritations. Please tick all that apply.

|            | Redness  | Itching | Swelling | Others (specify) | No reactions |
|------------|----------|---------|----------|------------------|--------------|
| Patch-TRAN | Mild     |         |          |                  |              |
|            | Moderate |         |          |                  |              |
|            | Severe   |         |          |                  |              |
| Patch-OA   | Mild     |         |          |                  |              |
|            | Moderate |         |          |                  |              |
|            | Severe   |         |          |                  |              |

---

Please write any additional comments below:

---

---

---

---

---

**Table S3.** The full participants' responses from the questionnaire.

| Partici-<br>pant | Q1 |    | Q2 |    | Q3 |    | Q4 |    | Q5 |    | Q6 |    | Comments                                                                                         |    |
|------------------|----|----|----|----|----|----|----|----|----|----|----|----|--------------------------------------------------------------------------------------------------|----|
|                  | OA | TR | OA                                                                                               | TR |
| 1                | 5  | 5  | 5  | 5  | 5  | 5  | 5  | 5  | 5  | 5  | Y  | N  | Mild redness and swelling; subsided after 24 hours; Felt Patch-OA had slightly stronger adhesion |    |
| 2                | 5  | 5  | 5  | 5  | 5  | 5  | 5  | 5  | 5  | 5  | N  | N  |                                                                                                  |    |
| 3                | 5  | 5  | 4  | 4  | 5  | 5  | 5  | 5  | 5  | 5  | N  | N  |                                                                                                  |    |
| 4                | 5  | 5  | 5  | 5  | 5  | 5  | 5  | 5  | 4  | 4  | Y  | N  | Slight blemish around the application area                                                       |    |
| 5                | 5  | 5  | 5  | 5  | 5  | 5  | 5  | 5  | 4  | 4  | N  | N  | One patch fell off one arm from scratching                                                       |    |
| 6                | 5  | 5  | 5  | 5  | 5  | 5  | 5  | 5  | 5  | 5  | N  | N  | Liked the transparency of the patch from the cosmetic perspective                                |    |
| 7                | 5  | 5  | 5  | 5  | 4  | 5  | 5  | 5  | 3  | 4  | N  | N  | One patch fell off one arm after 48 hours                                                        |    |
| 8                | 5  | 5  | 5  | 5  | 5  | 4  | 5  | 5  | 5  | 5  | N  | N  |                                                                                                  |    |
| 9                | 5  | 5  | 5  | 5  | 5  | 5  | 5  | 5  | 3  | 3  | N  | N  | A bit difficult to remove the patches after 72 hours                                             |    |
| 10               | 5  | 5  | 5  | 5  | 4  | 5  | 5  | 5  | 5  | 5  | N  | N  |                                                                                                  |    |
| 11               | 4  | 4  | 4  | 4  | 5  | 5  | 5  | 5  | 5  | 5  | N  | N  | Release liner removal could improve; one patch fell off one arm at 60 hours                      |    |

OA: Patch-OA; TR: Patch-TRAN; Y: Yes, side effects reported, see the comments section; and N: Nil.
